# Supplementary material
Source: PubMed Central journal article supplement (PMC5563577)
Supplement: IAI.00347-17_zii999092137s1.pdf [file IAI.00347-17_zii999092137s1.pdf]

## SUPPLEMENTAL MATERIAL

### **A nutrient-regulated cyclic diguanylate phosphodiesterase controls *Clostridium difficile* biofilm and toxin production during stationary phase**

Erin B. Purcell<sup>1</sup>, Robert W. McKee<sup>1</sup>, David S. Courson<sup>2</sup>, Elizabeth M. Garrett<sup>1</sup>, Shonna M. McBride<sup>3</sup>, Richard E. Cheney<sup>2</sup>, and Rita Tamayo<sup>1\*</sup>

<sup>1</sup>Department of Microbiology and Immunology, University of North Carolina at Chapel Hill School of Medicine, Chapel Hill, NC, USA

<sup>2</sup>Department of Cell Biology and Physiology, Lineberger Comprehensive Cancer Center, University of North Carolina at Chapel Hill School of Medicine, Chapel Hill, NC, USA

<sup>3</sup>Department of Microbiology and Immunology, Emory Antibiotic Resistance Center, Emory University School of Medicine, Atlanta, GA, USA

Table S1. Strains and plasmids used in this study.

Table S2. Oligonucleotides used in this study.

Figure S1. Construction of the *pdca::catP* mutant

Figure S2. Putative CodY binding site upstream of *pdca*.

**Table S1. Strains and plasmids used in this study.**

| <b>Name</b>                        | <b>Description</b>                                                                                                                                                              | <b>Reference</b> |
|------------------------------------|---------------------------------------------------------------------------------------------------------------------------------------------------------------------------------|------------------|
| <b><i>E. coli</i></b>              |                                                                                                                                                                                 |                  |
| DH5 $\alpha$                       | F- $\phi$ 80 <i>lacZ</i> $\Delta$ M15 $\Delta$ ( <i>lacZYA-argF</i> )U169 <i>recA1 endA1 hsdR17</i> (rk -, mk+) <i>phoA supE44 thi-1 gyrA96 relA1 <math>\lambda</math> tonA</i> | Invitrogen, (1)  |
| RT881                              | DH5 $\alpha$ pMC234                                                                                                                                                             | This study       |
| RT899                              | DH5 $\alpha$ pMC234:: <i>pdca</i> :: <i>catP</i>                                                                                                                                | This study       |
| RT1099                             | DH5 $\alpha$ pRT1099                                                                                                                                                            | This study       |
| RT1214                             | DH5 $\alpha$ pRT1214                                                                                                                                                            | This study       |
| BL21                               | <i>fhuA2 [lon] ompT gal [dcm] <math>\Delta</math>hsdS</i>                                                                                                                       | NEB              |
| RT489                              | BL21 pMMBneo:: <i>pdca</i>                                                                                                                                                      | (2)              |
| RT548                              | BL21 pMMBneo:: <i>pdca</i> (GA)                                                                                                                                                 | This study       |
| RT549                              | BL21 pMMBneo:: <i>pdca</i> - $\Delta$ PAS                                                                                                                                       | This study       |
| RT496                              | BL21 pMMBneo:: <i>pdca</i> -EAL                                                                                                                                                 | (2)              |
| HB101                              | F <sup>-</sup> <i>mcrB mrr hsdS20</i> (r <sub>B</sub> <sup>-</sup> m <sub>B</sub> <sup>-</sup> ) <i>recA13 leuB6 ara-14 proA2 lacY1 galK2 xyl-5 mtl-1 rpsL20</i>                | (3)              |
| HB101(pRK24)                       | <i>E. coli</i> strain used in conjugations with <i>C. difficile</i>                                                                                                             | (3)              |
| RT679                              | HB101(pRK24) pPdcA(GA)                                                                                                                                                          | This study       |
| RT680                              | HB101(pRK24) pPdcA- $\Delta$ PAS                                                                                                                                                | This study       |
| RT925                              | HB101(pRK24) pMC234:: <i>pdca</i> :: <i>catP</i>                                                                                                                                | This study       |
| RT1177                             | HB101(pRK24) pRT1099                                                                                                                                                            | This study       |
| RT1232                             | HB101(pRK24) pRT1214                                                                                                                                                            | This study       |
| <b><i>C. difficile</i></b>         |                                                                                                                                                                                 |                  |
| JIR8094                            | erythromycin-sensitive derivative of 630                                                                                                                                        | (4)              |
|                                    | JIR8094::pSD21 ( <i>codY</i> -null)                                                                                                                                             | (5)              |
| 630                                | Wild-type 630, ribotype 012                                                                                                                                                     | (6)              |
| RT476                              | 630 pMC-Pcpr                                                                                                                                                                    | (2)              |
| RT478                              | 630 pMC-Pcpr:: <i>pdca</i>                                                                                                                                                      | This study       |
| RT959                              | 630 <i>pdca</i> :: <i>catP</i>                                                                                                                                                  | This study       |
| RT1234                             | 630 pRT1099                                                                                                                                                                     | This study       |
| RT1235                             | 630 <i>pdca</i> :: <i>catP</i> pRT1099                                                                                                                                          | This study       |
| RT1237                             | 630 <i>pdca</i> :: <i>catP</i> pRT1214                                                                                                                                          | This study       |
| RT1668                             | 630 <i>pdca</i> :: <i>catP</i> pRT1662                                                                                                                                          | This study       |
| <b>Plasmids</b>                    |                                                                                                                                                                                 |                  |
| pMMBneo                            | Low copy expression vector, Ptac promoter, <i>neo</i> cassette                                                                                                                  | (7)              |
| pMMBneo:: <i>pdca</i>              | <i>pdca</i> -His6                                                                                                                                                               | (2)              |
| pMMBneo:: <i>pdca</i> -EAL         | <i>pdca</i> ( $\Delta$ 1-438)-His6 (EAL domain only)                                                                                                                            | (2)              |
| pMMBneo:: <i>pdca</i> (GA)         | <i>pdca</i> (GA)-His6 (full length PdcA with residues 350-354 (DGDEM) mutated to AAAAA)                                                                                         | This study       |
| pMMBneo:: <i>pdca</i> $\Delta$ PAS | <i>pdca</i> ( $\Delta$ 1-251)-His6 (GGDEF and EAL domains remain)                                                                                                               | This study       |
| pMC123                             | <i>E. coli</i> - <i>C. difficile</i> shuttle vector, <i>bla</i> , <i>catP</i>                                                                                                   | (3)              |
| pMC-Pcpr                           | pMC123 with nisin-inducible <i>cprABCK</i> promoter                                                                                                                             | (2)              |
| pPdcA                              | pMC-Pcpr:: <i>pdca</i> (CD630_15150)                                                                                                                                            | (2)              |
| pPdcA-EAL                          | pMC-Pcpr:: <i>pdca</i> -EAL (EAL domain only)                                                                                                                                   | (2)              |

|                                     |                                                                                                   |            |
|-------------------------------------|---------------------------------------------------------------------------------------------------|------------|
| pPdcA(GA)                           | pMC-Pcpr:: <i>pdca</i> (GA) (DGDEM to AAAAA mutations)                                            | This study |
| pPdcAΔPAS                           | pMC-Pcpr:: <i>pdca</i> ΔPAS (GGDEF and EAL domains remain)                                        | This study |
| pMC95                               | pUC19 with oriT                                                                                   | (8, 9)     |
| pMC234                              | <i>C. difficile</i> allelic exchange plasmid, pMC95 with <i>catP</i> in <i>Bam</i> HI site of MCS | This study |
| pMC234:: <i>pdca</i> :: <i>catP</i> | <i>pdca</i> upstream and downstream flanking sequences flanking the <i>catP</i> gene in pMC234    | This study |
| pBTS                                | <i>aad9</i> locus cloned into an <i>E. coli</i> / <i>S. aureus</i> shuttle vector                 | (10)       |
| pRT1099                             | pMC123 with <i>catP</i> replaced with <i>aad9</i>                                                 | This study |
| pRT1214                             | pRT1099 with P <sub><i>pdca</i></sub> - <i>pdca</i>                                               | This study |
| pRT1662                             | pRT1099 with P <sub><i>pdca</i></sub> - <i>pdca</i> (E479A)                                       | This study |
| pEAV1                               | <i>C. difficile codY</i> with 6x histidine-tag cloned in pBAD30, Ap                               | (5)        |

**Table S2- Oligonucleotides used in this study.**

| Name       | Sequence (5' to 3')*                                            | Reference  |
|------------|-----------------------------------------------------------------|------------|
| pdcaF      | CAGGTACCTTTAGGATACATTTTTATGAACAAACATAATT<br>TTGAAGTTATATTAATC   | (2)        |
| pdcaR      | CCCTGCAGCTAATGGTGATGGTGATGGTGATTATCTAGC<br>TTAAAAGGTCAAAGATTTTC | (2)        |
| pdcaAgaR   | CTTTATAAACTT <b>GCAGCAGCAGCAGCAGC</b> AGGCATTCTTGTT<br>GATAATG  | This study |
| pdcaAgaF   | CAACAAGAATGCCT <b>GTCTGTCTGTCTGTCA</b> AGTTTATAAAA<br>GTTTCAGC  | This study |
| pdcaAeaF   | ATAGGTGTAG <b>CAGTTCTTTTA</b> AGG                               | This study |
| pdcaAeaR   | CCTTAAAAGAACT <b>GCTACAC</b> CTAT                               | This study |
| pdcaAdpF   | CTAGGTACCTTTAGGATACATTTTTATGCGTGATGAATTT<br>GGAGAAC             | This study |
| pdcaFbamHI | CAGGATCCGAGCAGTAACTATGGAGGAG                                    | This study |
| pdcaRpstI  | GACCTGCAGATACTATTCCCAATTTAACATCC                                | (2)        |
| 67EHF      | CGACATCATAACGGTTCTGG                                            | (11)       |
| 67EHR      | TTCACTTCTGAGTTCGGCAT                                            | (11)       |
| pUCmcsF    | TCTTCGCTATTACGCCAG                                              | (8)        |
| m13R       | AACAGCTATGACCATG                                                | (12)       |
| tcdBqF     | AAGGAATATCTAGTTACAGAAGTATTAGAGC                                 | (13)       |
| tcdBR      | GCAGTGTCATTTATTTGACCTCCA                                        | (13)       |
| oMC15      | GCAGGCCCTCGGATCTTTCCGCTGCA                                      | This study |
| oMC16      | GCGACGTCCTTATCGGCCAGCCTCG                                       | This study |
| oMC2       | GCGGATCCTAGCGCCTACGGGGAATT                                      | This study |
| oMC143     | GCGGATCCCCTTGGTTGTGTTGCTTTTCG                                   | This study |
| pdcaF1     | CAAGAATTCACCTTAAACCCACCAAATG                                    | This study |
| pdcaR1     | CAAGGTACCCATATACTTATCTCCTCCATAGTTAC                             | This study |
| pdcaF2     | CAAGTCGACGATAATTAATTCTAATTTATCAATAATATCA<br>CTG                 | This study |
| pdcaR2     | CAACTGCAGCCTCTAAACTCATTCCATTTCTC                                | This study |

|             |                                  |            |
|-------------|----------------------------------|------------|
| pdcaR0      | AGCTGGGGAGTTCTATTTTG             | This study |
| blaF        | CATGAGATTATCAAAAAGGATCTTC        | This study |
| blaR        | GCCTTCCTGTTTTTGCTCAC             | This study |
| aad9F_EcoRV | GATATCGTAACGTGACTGGCAAGAG        | This study |
| aad9R_EcoRV | GATATCACCCAAAATTGAAAAAAGTGTTTCC  | This study |
| pdcaPromF   | AAAGCATGCACCATCCATAAATATCTTACCA  | This study |
| pdcaPromR   | GACGGATCCATACTATTCCCAATTTAACATCC | This study |
| rpoCqF      | CTAGCTGCTCCTATGTCTCACATC         | (2)        |
| rpoCqR      | CCAGTCTCTCCTGGATCAACTA           | (2)        |
| pdcaqF      | AGATATTGCAAACCTCAACAAGCTTAAA     | This study |
| pdcaqR      | TAATCAAAGCATCGTAAAGCAATGTA       | This study |
| tcdRqF      | AGCAAGAAATAACTCAGTAGATGATT       | (13)       |
| tcdRqR      | TTATTAAATCTGTTTCTCCCTCTTCA       | (13)       |
| ilvCqF      | AACGGTGTACATGTAATGATAGGTC        | This study |
| ilvCqR      | TTTGTAGCTTCTGCTACACTCTTAAC       | This study |
| codYqF      | ATTAGGAACATTGGTACTTTCAAGAT       | (2)        |
| codYqR      | TTGAACTACAGCTTTCTTTCTCATTT       | (2)        |
| tcdAqF      | GGAGAAGTCAGTGATATTGCTCTTG        | This study |
| tcdAqR      | CAGTGGTAGAAGATTCAACTATAGCC       | This study |
| flgBqF      | GCAACTAATCTAAGAAGTCAGACAATAGC    | This study |
| flgBqR      | AGGCATAGCATCATTTAGTGTTTCTTC      | This study |
| fliCqF      | TACAAGTTGGAGCAAGTTATGGAAC        | This study |
| fliCqR      | GTTGTTATACCAGCTGAAGCCATTA        | This study |
| OSD107      | AAGAGAGATAACTGTTGAAAGATGAGAC     | (14)       |
| OSD108      | CTTCATAACCTAAAACCTGCAAC          | (14)       |
| pdcaAemsaF  | TGGACAATTTGTCAAGATTAGATCC        | This study |
| pdcaAemsaR  | CAACAACTTTTCTTCTGGATC            | This study |
| gbpAqF      | CAGTGGATTAGCGTATGGACAC           | (15)       |
| gbpAqR      | GTATTGAATCGCGCCACAGT             | (15)       |

\*Restriction sites are underlined. Altered nucleotides for generating point mutations are in bold text.

Figure S1

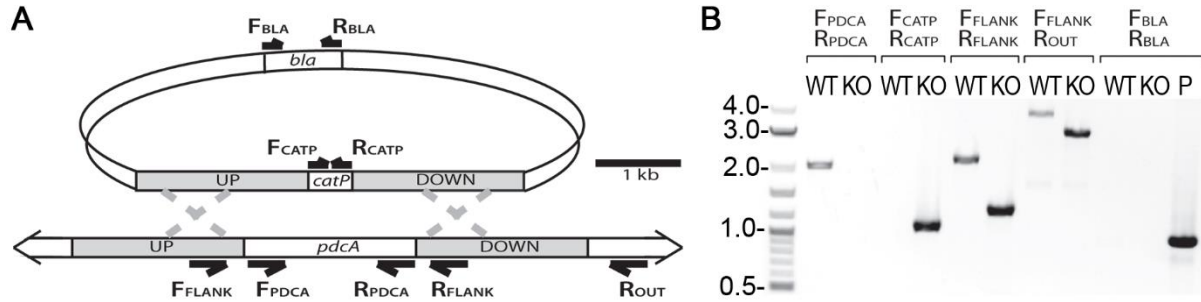

**Figure S1. Construction of the *pdca::catP* mutant.** (A) Schematic representation of the double homologous recombination between pMC234::*pdca::catP* and the *C. difficile* 630 chromosome. Regions of homology are in grey. The positions of screening PCR primers are indicated. (B) PCRs were performed with the indicated screening primers using lysates of *C. difficile* 630 (WT) or candidate 630 *pdca::catP* (KO) as the templates. A control PCR was done with the *blaF*+*blaR* primers using purified pMC234::*pdca::catP* (P).

## Figure S2

...tgacaatttgtcaagattagtagtaccagttaaaatttaataataagagagagatgtattatgtaatat  
taatttttttaaatggtaatactatattgctgtattttttttatcaattataatttaaaatatgaag  
taataaaccttcttaattaaattaaggtatttagtgtatatgtataagttataagtaaactcttctaaaag  
aataattttaacaatgttgttataaagagcagtaactatggaggagataagtatATGAACAAACATAATT  
TTGAAGTTATATTAAATCAACTACAGATTAATATATATGTTACAAATATTCATACTAATGAAATTATTTT  
TATGAACAAAAAATGAAAGAAGAATATAATATTTTAGATCCAGAAGGAAAAGTTTGTG...

|                 |                                                    |
|-----------------|----------------------------------------------------|
| AATTTTCWGAAAATT | CodY box ( <i>L. lactis</i> , <i>B. subtilis</i> ) |
| AATTTTAACAATGTT | putative CodY binding site for <i>pdca</i>         |
| ***** * ** **   |                                                    |

**Figure S2. Putative CodY binding site upstream of *pdca*.** (A) The sequence of the DNA fragment used in the electrophoretic mobility shift assays is shown (407 bp). Highlighted is the sequence pulled down by CodY in the prior study by Dineen, McBride and Sonenshein (J. Bacteriol, 2010, 192:5350-62). The underlined sequence corresponds to a putative CodY binding site. (B) Alignment of the putative CodY binding site for *pdca* with the CodY box previously identified for *B. subtilis*, *L. lactis* and *C. difficile*. Asterisks indicate conserved nucleotides, with 4/15 matching the CodY box sequence.

Figure S3.

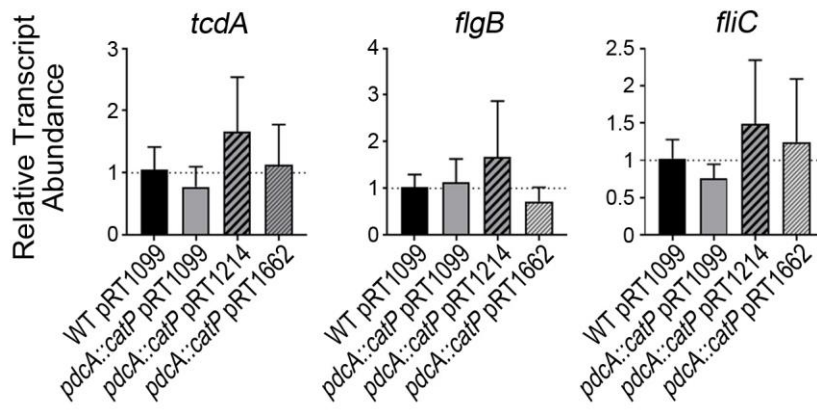

**Figure S3. Complementation of toxin and flagellar gene expression during growth in stationary phase.** Relative transcript levels of *tcdA*, *flgB*, and *fliC* in wild-type with control vector pRT1099 (black), *pdca::catP* with control vector (grey), *pdca::catP* complemented with the wild-type *pdca* allele in pRT1214 (thick lines), and *pdca::catP* complemented with the mutant *pdca*-479A allele in pRT1662 (thin lines) cells during stationary phase. The means and standard deviations from five biological replicates are shown. The data were analyzed by one-way ANOVA and Tukey's multiple comparisons test. No statistically significant differences were found.

## Literature Cited

1. **Hanahan D.** 1983. Studies on transformation of *Escherichia coli* with plasmids. *J Mol Biol* **166**:557-580.
2. **Purcell EB, McKee RW, McBride SM, Waters CM, Tamayo R.** 2012. Cyclic diguanylate inversely regulates motility and aggregation in *Clostridium difficile*. *Journal of Bacteriology* **194**:3307-3316.
3. **McBride SM, Sonenshein AL.** 2011. Identification of a genetic locus responsible for antimicrobial peptide resistance in *Clostridium difficile*. *Infect Immun* **79**:167-176.
4. **O'Connor JR, Lyras D, Farrow KA, Adams V, Powell DR, Hinds J, Cheung JK, Rood JI.** 2006. Construction and analysis of chromosomal *Clostridium difficile* mutants. *Mol Microbiol* **61**:1335-1351.
5. **Dineen SS, Villapakkam AC, Nordman JT, Sonenshein AL.** 2007. Repression of *Clostridium difficile* toxin gene expression by CodY. *Mol Microbiol* **66**:206-219.
6. **Wüst J, Sullivan NM, Hardegger U, Wilkins TD.** 1982. Investigation of an outbreak of antibiotic-associated colitis by various typing methods. *Journal of Clinical Microbiology* **16**:1096-1101.
7. **Osorio CG, Crawford JA, Michalski J, Martinez-Wilson H, Kaper JB, Camilli A.** 2005. Second-generation recombination-based in vivo expression technology for large-scale screening for *Vibrio cholerae* genes induced during infection of the mouse small intestine. *Infect Immun* **73**:972-980.
8. **Yanisch-Perron C, Vieira J, Messing J.** 1985. Improved M13 phage cloning vectors and host strains: nucleotide sequences of the M13mp18 and pUC19 vectors. *Gene* **33**:103-119.
9. **Lyras D, Rood JI.** 1998. Conjugative transfer of RP4-oriT shuttle vectors from *Escherichia coli* to *Clostridium perfringens*. *Plasmid* **39**:160-164.
10. **Fuller JR, Vitko NP, Perkowski EF, Scott E, Khatri D, Spontak JS, Thurlow LR, Richardson AR.** 2011. Identification of a lactate-quinone oxidoreductase in *Staphylococcus aureus* that is essential for virulence. *Frontiers in Cellular and Infection Microbiology* **1**:19.
11. **Tamayo R, Schild S, Pratt JT, Camilli A.** 2008. Role of cyclic di-GMP during El Tor biotype *Vibrio cholerae* infection: characterization of the in vivo-induced cyclic di-GMP phosphodiesterase CdpA. *Infect Immun* **76**:1617-1627.
12. **Messing J.** 1983. New M13 vectors for cloning. *Methods Enzymol* **101**:20-78.
13. **McKee RW, Mangalea MR, Purcell EB, Borchardt EK, Tamayo R.** 2013. The second messenger cyclic di-GMP regulates *Clostridium difficile* toxin production by controlling expression of *sigD*. *J Bacteriol* **195**:5174-5185.
14. **Dineen SS, McBride SM, Sonenshein AL.** 2010. Integration of metabolism and virulence by *Clostridium difficile* CodY. *J Bacteriol* **192**:5350-5362.
15. **Kariisa AT, Grube A, Tamayo R.** 2015. Two nucleotide second messengers regulate the production of the *Vibrio cholerae* colonization factor GbpA. *BMC Microbiol* **15**:166.
